# Supplementary material for: The characteristics of COVID-19 vaccine-related headache: Clues gathered from the healthcare personnel in the pandemic
Source: PubMed Central journal article supplement (PMC8988457; doi:10.1177/03331024211042390), 2021-09-12
Supplement: sj-pdf-1-cep-10.1177_03331024211042390.pdf [file sj-pdf-1-cep-10.1177_03331024211042390.pdf]

**Supplement 2: Multivariate analyses including risk factors available in all group of 1819 participants**

| <b>Variables</b>                        | B      | S.E. | Wald    | df | Sig. | Exp(B) | 95% C.I. for EXP(B) |       |
|-----------------------------------------|--------|------|---------|----|------|--------|---------------------|-------|
|                                         |        |      |         |    |      |        | Lower               | Upper |
| Pre-existing primary headache           | .772   | .110 | 49.178  | 1  | .000 | 2.164  | 1.744               | 2.685 |
| Thyroid disorder                        | .435   | .152 | 8.145   | 1  | .004 | 1.544  | 1.146               | 2.082 |
| Fever as COVID-19 vaccine adverse event | 1.384  | .250 | 30.736  | 1  | .000 | 3.990  | 2.446               | 6.507 |
| Female gender                           | .676   | .125 | 29.127  | 1  | .000 | 1.965  | 1.538               | 2.512 |
| Constant                                | -1.872 | .122 | 236.152 | 1  | .000 | .154   |                     |       |

B: beta (regression coefficient); SE, standard error; d.f., degree for freedom; Sig., significance; Exp (B), OR: exponential B, odds ratio. (This model classified 70.8% of all cases correctly with a cut value of .05)
